# Supplementary material
Source: PubMed Central journal article supplement (PMC7415534)
Supplement: NIHMS1576552-supplement-1.pdf [file NIHMS1576552-supplement-1.pdf]

## Supplemental Materials

**Supplemental Table 1.** Patient characteristics

| <b>Patient #</b> | <b>Age (years)</b> | <b>Sex</b> | <b>Prior nephrectomy</b> | <b>Histology</b>                                     | <b>IMDC risk group</b> | <b>Sites of metastasis<sup>a</sup></b>           |
|------------------|--------------------|------------|--------------------------|------------------------------------------------------|------------------------|--------------------------------------------------|
| 1                | 62                 | Male       | Yes                      | Clear cell + rhabdoid and sarcomatoid transformation | Intermediate           | Lungs, lymph nodes                               |
| 2                | 54                 | Male       | Yes                      | Clear cell + rhabdoid and sarcomatoid transformation | Intermediate           | Lungs, bones, brain                              |
| 3                | 39                 | Male       | Yes                      | Clear cell + rhabdoid transformation                 | Poor                   | Lungs, liver                                     |
| 4                | 63                 | Male       | Yes                      | Clear cell                                           | Intermediate           | Lungs, lymph nodes, nephrectomy bed nodule       |
| 5                | 56                 | Male       | Yes                      | Clear cell                                           | Poor                   | Lungs, lymph nodes, brain, bones, adrenal glands |
| 6                | 63                 | Male       | No                       | Clear cell                                           | Poor                   | Lungs, Bones, Brain                              |
| 7                | 57                 | Male       | Yes                      | Clear cell with sarcomatoid changes                  | Intermediate           | Lymph nodes, Bones                               |

<sup>a</sup>At the time of initiation of lenvatinib plus everolimus treatment.

IMDC, International Metastatic renal cell carcinoma Database Consortium.

**Supplemental Table 2.** Genomic and PD-L1 data

| <b>Patient #</b> | <b>Genomic variants</b>                                                                              | <b>Copy number variations</b>                                                | <b>PD-L1 expression</b> |
|------------------|------------------------------------------------------------------------------------------------------|------------------------------------------------------------------------------|-------------------------|
| 1                | <i>PBRM1</i> LOF<br><i>VHL</i> LOF<br><i>PTEN</i> LOF<br><i>ARID1A</i> LOF<br><i>LIFR</i> frameshift | None                                                                         | Not assessed            |
| 2                | Not assessed                                                                                         | Not assessed                                                                 | Not assessed            |
| 3                | <i>VHL</i> LOF<br><i>SETD2</i> LOF<br><i>ARID2</i> GOF                                               | <i>CDKN1B</i> CNG                                                            | Negative                |
| 4                | <i>VHL</i> LOF                                                                                       | None                                                                         | Negative                |
| 5                | <i>PBRM1</i> LOF                                                                                     | None                                                                         | Positive                |
| 6                | <i>VHL</i> LOF<br><i>PIK3R1</i> LOF<br><i>KDM5C</i> LOF                                              | <i>PTEN</i> CNL<br><i>CDKN2A</i> CNL<br><i>CDKN2B</i> CNL<br><i>MTAP</i> CNL | Negative                |
| 7                | None                                                                                                 | <i>CDKN2A</i> CNL<br><i>CDKN2B</i> CNL<br><i>MTAP</i> CNL                    | Negative                |

CNG, Copy Number Gain; CNL, Copy Number Loss; GOF, gain of function; LOF, loss of function; PD-L1, programmed death ligand-1.

**Supplemental Figure 1.** Imaging results for Patient 1 with mRCC who received lenvatinib plus everolimus treatment. The first image (MRI of the brain) shows the tumor size (mid-right side of the brain) after treatment for 2 weeks (a); the patient then discontinued treatment due to toxicity and experienced a rapid progression 5 days later (b; tumor regrowth ); after which, the patient resumed lenvatinib plus everolimus treatment and experienced a rapid improvement (as indicated by the brain MRI taken approximately 2 weeks later) (c).

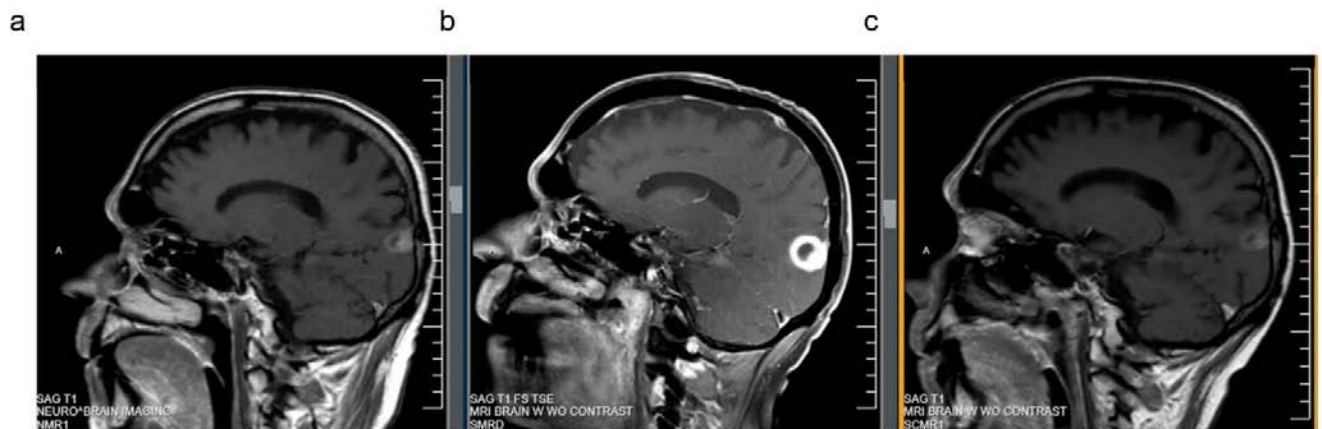

MRI, magnetic resonance imaging; mRCC, metastatic renal cell carcinoma.
